# Supplementary material
Source: publisher figshare collection journal article supplement (https://geolsoc.figshare.com/ndownloader/files/14312861)
Supplement: Supplementary file 1 [file 14312861]

## Sheet: Sheet1
Table S5 Patuki Melange ch. 7 Otama area XRF	OTAMA COMPLEX
Rock type	basalt	basalt (hyaloclatite)	diorite block	basalt	basalt		basalt	basalt	amphibolite	dolerite	dolerite		basalt	basalt
Region	Lintley Hills	Lintley Hills	Lintley Hills	Lintley Hills	Lumsden area		Otama area	Otama area	Otama area	Otama area	Otama area		Arthurton area	Arthurton area
GPS	E21 55355 N54 49183	E21 55356 N54 491112	E21 56157 N54 96537	E21 56229 N54 90620	E21 58830 N54 87808		E21 96148 N54 68468	E21 96148 N54 68468	E21 94852 N54 67320	E21 94852 N54 67320	E21 91689 N54 67320		E22 18953 N54 52727	E22 18953 N54 52967
Major Elements
SiO2	51.31	49.26	62.4909	50.88	56.34		53.28	53.41	49.7574	49.03	45.9162		52.9141	51.6604
Al2O3	14.94	15.39	13.0248	15.68	13.95		15.01	12.45	13.7907	14.11	22.6314		14.4275	14.8354
Fe2O3	9.84	7.33	10.7636	7.82	11.17		11.8	13.21	12.7611	13.26	4.1382		13.3231	9.16395
MgO	6.82	7.19	3.10545	8.87	3.21		4.12	3.97	6.4746	6.21	5.1282		3.31335	4.6168
CaO	7.84	13.17	0.9045	7.49	5.71		6.32	8.17	7.9992	9.28	12.1077		7.8605	11.4425
Na2O	3.96	2.42	4.95465	3.94	4.73		4.97	4.24	3.7125	3.3	3.1086		3.5223	3.57205
K2O	0.639	0.943	1.06228	0.034	0.438		0.369	0.199	0.89298	0.845	0.24849		0.030845	0.184075
TiO2	0.652	0.279	0.865305	0.331	1.162		1.322	2.076	2.11068	2.165	0.17424		1.46962	1.43479
MnO	0.134	0.122	0.10251	0.137	0.155		0.179	0.202	0.2277	0.216	0.08217		0.184075	0.16517
P2O5	0.093	0.065	0.12663	0.073	0.199		0.247	0.27	0.21681	0.199	0.01683		0.23482	0.209945
LOI	3.33	3.44	2.48	4.16	2.54		2.15	1.64	1.82	1.36	6.15		2.48	2.63
Total	99.558	99.609	99.8806	99.415	99.604		99.767	99.837	99.7637	99.975	99.702		99.7602	99.9151
Trace Elements
Zn	80.2	77.5	49.9	56.6	94.6		97.7	124.3	106.8	110.5	22.1		109.6	60.4
Cu	7.6	12.7	43.8	58.6	30.4		99	4.6	103.5	168.4	12		147.4	80.5
Ni	0	50.8	64.2	70.6	16.3		17.9	21.4	54.9	53	42.9		10.4	37.1
Cr	-1.7	73.2	161.9	158.8	4.6		n.d.	18.4	78.4	71.5	76		12.2	60
V	14.7	295.8	210.6	194.3	381.7		356.8	414	417.5	413	88.8		405.9	331.9
Ba	33	70.2	79.5	13.5	44.2		22.6	6.1	54.3	60.3	18.2		12.9	22.9
Sc	17.9	43.4	40.1	45.1	34.1		38.3	36.5	53	50.8	30.8		40.6	33.2
La	6.8	1.6	1.5	3.1	1.6		4.6	1.2	1.1	0.6	n.d.		1.7	0.7
Ce	22.3	9.3	5.2	7.3	15.9		25.2	20.4	21.9	21.9	5.2		20	14.3
Nd	20.3	6.8	4.5	4.8	11.7		16.8	16.1	18.3	17.3	1.7		14.4	11.2
U	0.2	-0.2	-0.2	-0.4	0.3		0.4	0.4	0.5	0.1	n.d.		0.5	0
Th	0.5	0.3	1.8	0.7	1		0.6	n.d.	n.d.	0.2	0.2		n.d.	n.d.
Pb	2.8	3.7	4	3.4	1.3		0.6	1.2	0.7	1.2	n.d.		0.9	1.1
Nb	2.2	0.7	0.8	0.6	1.3		5.4	5.4	4.8	5.1	0.3		3	6.5
Zr	160.9	38.6	17.1	18.5	76.1		130.5	150.9	156.8	152.1	7.1		99.2	104.7
Y	54	15.8	7.7	8.2	28.3		34	45.9	50.7	49.8	4.8		31.6	24.6
Sr	78.9	215	69.7	117.7	82.2		242.3	284	260.8	239.6	554.1		188.8	176
Rb	2	7.8	9.2	0.2	4.3		3.6	1.7	11.6	12.7	1.7		0.4	2.4
